# Supplementary material
Source: MDPI journal article supplement (https://www.mdpi.com/2077-1312/10/9/1328)
Supplement: s1 [file s1]

| References                         | Year | Site                                    | Sampling time         | Lenght (mm)    |               | Size range | Gamete emission peak        | Survey |
|------------------------------------|------|-----------------------------------------|-----------------------|----------------|---------------|------------|-----------------------------|--------|
|                                    |      |                                         |                       | Early maturity | Full maturity |            |                             |        |
| Salvatorelli                       | 1967 | Chioggia<br>(N Adriatic Sea)            | N.D.                  | N.D.           | N.D.          | N.D.       | July – Aug.                 | H      |
| Poggiani et al.                    | 1973 | N and C Adriatic Sea                    | July 1968 – Mar. 1970 | 16 – 18        | N.D.          | N.D.       | July – Aug.                 | H      |
| Froggia                            | 1975 | C Adriatic Sea                          | N.D.                  | N.D.           | N.D.          | N.D.       | May – July;<br>Sept. – Oct. | M      |
| Marano et al.                      | 1980 | Gulf of Manfredonia<br>(S Adriatic Sea) | Jan. – Dec. 1978      | N.D.           | N.D.          | N.D.       | Late Apr.;<br>Aug. – Sept.  | H      |
| Marano et al.                      | 1982 | Gulf of Manfredonia<br>(S Adriatic Sea) | Jan. 1978 – Dec. 1979 | N.D.           | N.D.          | Medium     | Sept. – Oct.                | H      |
| Valli and<br>Zecchini-<br>Pinesich | 1981 | Grado<br>(N Adriatic Sea)               | Apr. 1975 - 1979      | N.D.           | N.D.          | N.D.       | June – Aug.                 | H      |
| Corni et al.                       | 1985 | Cesenatico<br>(N Adriatic Sea)          | Sept. – Dec. 1982     | N.D.           | N.D.          | Commercial | Post Emission               | H      |
| Valli et al.                       | 1985 | Grado<br>(N Adriatic Sea)               | Sept. 1981 – 1982     | N.D.           | N.D.          | 12.5 –38.3 | Apr. – July                 | H      |

N.D. indicates data not available or not determinable (Source MIPAAF, modified with data updated to 2019).

C, N and S indicate Center, North and South, respectively.

H and M indicate histological and macroscopic, respectively.

**Supplementary materials; Table S1.** Summary of references and reproductive data for *Chamelea gallina*. Basin of reference: Mediterranean Sea.

| References                   | Year | Site                                  | Sampling time         | Length (mm)    |               | Size range | Gamete emission peak        | Survey |
|------------------------------|------|---------------------------------------|-----------------------|----------------|---------------|------------|-----------------------------|--------|
|                              |      |                                       |                       | Early maturity | Full maturity |            |                             |        |
| Cordisco et al.              | 2005 | Molise, Apulia (C and S Adriatic Sea) | 2000 – 2001 – 2003    | N.D.           | N.D.          | N.D.       | Apr. – July                 | M      |
| IZS Abruzzo e Molise         | 2006 | Pescara (C Adriatic Sea)              | N.D.                  | 12             | N.D.          | N.D.       | N.D.                        | N.D.   |
| Romanelli et al.             | 2009 | Adriatic Sea                          | N.D.                  | 13 – 15        | 20 – 25       | N.D.       | N.D.                        | N.D.   |
| Rizzo et al.                 | 2011 | Chioggia (N Adriatic Sea)             | June 2009 – Feb. 2010 | N.D.           | N.D.          | N.D.       | June – July;<br>Dec. – Feb. | M      |
| Franceschini and Bernardello | 2013 | Veneto (N Adriatic Sea)               | N.D.                  | 13 – 15        | 20 – 25       | N.D.       | Apr. – Sept.                | N.D.   |
| Scopa et al.                 | 2014 | Molise (C Adriatic Sea)               | 2003-2012             | 13 – 15        | 20 – 25       | N.D.       | Apr. – Oct.                 | N.D.   |
| MIPAAF                       | 2015 | Italian Coasts                        | N.D.                  | 15             | 20            | N.D.       | Mar. – Apr.;<br>Oct. – Nov. | N.D.   |
| MIPAAF                       | 2017 | (N and C Adriatic Sea)                | Apr. – June 2017      | 10             | 11 – 12       | N.D.       | May – Sept.                 | H      |
| MIPAAF                       | 2018 | (N and C Adriatic Sea)                | Jan. – Dec. 2018      | 8 – 9          | 10 – 11       | N.D.       | May – June                  | H      |

**Supplementary materials; Table S1.** (Continued)

| References                 | Year | Site                     | Sampling time        | Lenght (mm)    |               | Size range | Gamete emission peak | Survey |
|----------------------------|------|--------------------------|----------------------|----------------|---------------|------------|----------------------|--------|
|                            |      |                          |                      | Early maturity | Full maturity |            |                      |        |
| Ràmon Herrero              | 1993 | Gulf of Valencia         | May 1988 – 1990      | N.D.           | N.D.          | >20        | June – Aug.          | M      |
| Rodríguez de la Rúa et al. | 2003 | Atlantic – Mediterranean | June 1999 – May 2000 | 16             | N.D.          | 5.7 – 35.2 | Apr. – July          | H      |
| Delgado et al.             | 2013 | Gulf of Cadiz            | May 2010 – Apr. 2011 | 10.29          | N.D.          | 3 – 32     | Mar. – Sept.         | H      |
| Joaquim et al.             | 2014 | Gulf of Cadiz            | Jan. – Dec. 2009     | N.D.           | N.D.          | 24 – 30    | June – Aug.          | H      |

N.D. indicates data not available or not determinable (Source MIPAAF, modified with data updated to 2019).

H and M indicate histological and macroscopic, respectively.

**Supplementary materials; Table S2.** Summary of references and reproductive data for *Chamelea gallina*. Basin of reference: Atlantic Ocean.

| References    | Year | Site               | Sampling time         | Lenght (mm)    |               | Size range | Gamete emission peak |
|---------------|------|--------------------|-----------------------|----------------|---------------|------------|----------------------|
|               |      |                    |                       | Early maturity | Full maturity |            |                      |
| Dalgic et al. | 2009 | Southern Black Sea | Dec. 2002 – Nov. 2003 | N.D.           | N.D.          | N.D.       | June – Aug.          |
| Erkan         | 2009 | Southern Black Sea | July 2006             | N.D.           | N.D.          | >20        | June – July          |

N.D. indicates data not available or not determinable (Source MIPAAF, modified with data updated to 2019).

**Supplementary materials; Table S3.** Summary of references and reproductive data for *Chamelea gallina*. Basin of reference: Black Sea.

| Site                                   | Year | Source                                                                                                                                                                                                                      |
|----------------------------------------|------|-----------------------------------------------------------------------------------------------------------------------------------------------------------------------------------------------------------------------------|
| N Adriatic Sea                         | 2004 | <a href="https://ricerca.gelocal.it/nuovavenezia/archivio/nuovavenezia/2004/11/09/VP6VM_VP603.html">https://ricerca.gelocal.it/nuovavenezia/archivio/nuovavenezia/2004/11/09/VP6VM_VP603.html</a>                           |
| N Adriatic Sea                         | 2008 | <a href="https://www.venetoagricoltura.org/">https://www.venetoagricoltura.org/</a> ; ISPRA, 2008                                                                                                                           |
| N Adriatic Sea (Friuli–Venezia Giulia) | 2011 | <a href="https://www.ansa.it/mare/notizie/rubriche/ambienteepesca/2011/08/21/visualizza_new.html_753631241.html">https://www.ansa.it/mare/notizie/rubriche/ambienteepesca/2011/08/21/visualizza_new.html_753631241.html</a> |
| Po river estuary (Emilia–Romagna)      | 2013 | <a href="https://www.ilrestodelcarlino.it/">https://www.ilrestodelcarlino.it/</a>                                                                                                                                           |
| C–N Adriatic                           | 2018 | Piano di Attuazione DM 17/06/2019                                                                                                                                                                                           |
| Porto Viro (Veneto)                    | 2020 | <a href="https://www.rovigoindiretta.it/">https://www.rovigoindiretta.it/</a>                                                                                                                                               |

C and N indicate Center and North, respectively.

**Supplementary materials; Table S4.** List of the main clam die-offs recorded in the last 20 years.

| Consortium name              | Co.Ge.Mo.<br>Monfalcone                                                                                                                                             | Co.Ge.Vo.Venezia.                                                                                                                                                                                                                                                                                                                                                                                                                           | Co.Ge.Vo.Chioggia                                                                                                                                                                                                                                                                                                                                                                                                           | Co.Ge.Mo.<br>Ravenna                                                                                                                                       | Co.Ge.Mo Rimini.                                                                                                                     | Consorzio<br>Co.Ge.Vo Pesaro.                                                                                 | Co.Ge.Vo Ancona                                                                                                | Co.Ge.Vo<br>Civitanova Marche.                                                                                |
|------------------------------|---------------------------------------------------------------------------------------------------------------------------------------------------------------------|---------------------------------------------------------------------------------------------------------------------------------------------------------------------------------------------------------------------------------------------------------------------------------------------------------------------------------------------------------------------------------------------------------------------------------------------|-----------------------------------------------------------------------------------------------------------------------------------------------------------------------------------------------------------------------------------------------------------------------------------------------------------------------------------------------------------------------------------------------------------------------------|------------------------------------------------------------------------------------------------------------------------------------------------------------|--------------------------------------------------------------------------------------------------------------------------------------|---------------------------------------------------------------------------------------------------------------|----------------------------------------------------------------------------------------------------------------|---------------------------------------------------------------------------------------------------------------|
| Compartment                  | From the mouth of the Isonzo river (north) to Punta Tagliamento (south)                                                                                             | From Punta Tagliamento (north) to the North dam of the port of Chioggia (south)                                                                                                                                                                                                                                                                                                                                                             | Chioggia - From the north dam of the port of Chioggia (north) to the mouth of Po di Goro (south)                                                                                                                                                                                                                                                                                                                            | Ravenna - From the Po di Goro lighthouse (north) to Canale Tagliata north of Cesenatico (south)                                                            | Rimini - From Canale Tagliata in Cesantico (north) to the port of Cattolica (south)                                                  | From Gabicce (north) to the Cesano river (south)                                                              | From the Cesano river (north) to the Potenza river (south)                                                     | From the Potenza river (north) to the Chienti river (south).                                                  |
| Number of associated vessels | 42 out of 42 (18 clam and 24 cockles)                                                                                                                               | 86 out of 86 (63 clam and 23 cockles)                                                                                                                                                                                                                                                                                                                                                                                                       | 77 out of 77 (58 clam and 19 cockles)                                                                                                                                                                                                                                                                                                                                                                                       | 18 out of 18 (clam)                                                                                                                                        | 36 out of 36 (clam)                                                                                                                  | 65 out of 65 (clam)                                                                                           | 74 out of 74 (clam)                                                                                            | 25 out of 25 (clam)                                                                                           |
| Reference scientific body    | University of Trieste + AGRI.TE.CO., Venice                                                                                                                         | AGRI.TE.CO., Venice                                                                                                                                                                                                                                                                                                                                                                                                                         | AGRI.TE.CO., Venice                                                                                                                                                                                                                                                                                                                                                                                                         | University of Bologna (Biology and Fisheries Laboratory, Fano)                                                                                             | Cooperative MARE, Cattolica.                                                                                                         | University of Bologna (Biology and Fisheries Laboratory, Fano)                                                | CNR-IRBIM (formerly ISMAR).                                                                                    | CNR-IRBIM (formerly ISMAR).                                                                                   |
| Target species               | Cockles, razor clams, clams and peanut worm                                                                                                                         | Clams and cockles, razor clams, lagoon cockle and murexes                                                                                                                                                                                                                                                                                                                                                                                   | Clams and cockles, razor clams, lagoon cockle, peanut worm and murexes                                                                                                                                                                                                                                                                                                                                                      | Clams                                                                                                                                                      | Clams                                                                                                                                | Clams                                                                                                         | Clams                                                                                                          | Clams                                                                                                         |
| Strengths                    | Sowing, restocking and rotation<br>Coordination with Co.Ge.Vo ;<br>reduction of fishing effort for bivalves and peanut worm<br>Collaboration with scientific bodies | Management of bivalve stocks with excellent yields in terms of production and socio-economic level<br>Sowing, restocking and rotation activities<br>Management measures towards nourishment and the Mo.S.E.<br>Supracompartmental coordination<br>Co.Ge.Vo. of Chioggia and Monfalcone - OP Bivalvia Veneto and Op Fasolari<br>Constant monitoring of the resource<br>Collaboration with scientific body well-developed commercial policies | Management of bivalve stocks with excellent yields in terms of production and socio-economic level<br>Sowing, restocking and rotation activities<br>Management measures towards nourishment and the Mo.S.E.<br>Supracompartmental coordination<br>Co.Ge.Vo. of Venezia - OP Bivalvia Veneto and Op Fasolari<br>Constant monitoring of the resource<br>Collaboration with scientific body well-developed commercial policies | Sowing, restocking and rotation activities<br>Creation of nursery areas<br>Constant monitoring of the resource<br>Collaboration with small-scale fishermen | Rotation of fishing activities<br>Constant monitoring of the resource<br>Collaboration with scientific bodies<br>Commercial policies | Rotation of fishing activities<br>Biennial monitoring of the resource<br>Collaboration with scientific bodies | Rotation of fishing activities<br>Biennial monitoring of the resource<br>Collaboration with scientific bodies. | Rotation of fishing activities<br>Biennial monitoring of the resource<br>Collaboration with scientific bodies |

**Supplementary materials; Table S5a.** Consorsia present in Italy, with details on dislocation and fleet main characteristic and technologies.

|                        |                                                                                               |                                                                                                                                                                                      |                                                                                                                                                                                      |                                                                                                                                                                                                                         |                                                                                                                                                                                  |                                                          |                                                                  |                                                                   |
|------------------------|-----------------------------------------------------------------------------------------------|--------------------------------------------------------------------------------------------------------------------------------------------------------------------------------------|--------------------------------------------------------------------------------------------------------------------------------------------------------------------------------------|-------------------------------------------------------------------------------------------------------------------------------------------------------------------------------------------------------------------------|----------------------------------------------------------------------------------------------------------------------------------------------------------------------------------|----------------------------------------------------------|------------------------------------------------------------------|-------------------------------------------------------------------|
| <b>Critical issues</b> | Natural banks in an extremely critical phase, in particular for clam and razor clam resources | In the last 5 years the razor clam resource has become almost nil, such as not to allow any fishing activity Nourishment and port activities along the coast Intense die-off in 2018 | In the last 5 years the razor clam resource has become almost nil, such as not to allow any fishing activity Nourishment and port activities along the coast Intense die-off in 2018 | Fishing activity is limited in the southern part of the compartment due to environmental limitations, infrastructures, Military Polygon etc. Unauthorized fishing for <i>Tapes philippinarum</i> Several die-off events | Massive presence of urban centers with a strong seaside tourist vocation Presence of numerous shellfish farming facilities Decrease in production yields Intense die-off in 2018 | Fluctuation of production yields Intense die-off in 2018 | Fluctuation of production yields Intense die-off in 2018         | Fluctuation of production yields Intense die-off in 2018          |
| <b>Notes</b>           | All boats are equipped with a GPS system                                                      | All boats are equipped with a AIS system                                                                                                                                             | All boats are equipped with a AIS system                                                                                                                                             | 18 boats equipped with a GPS system                                                                                                                                                                                     | GPS system provided by Visurin                                                                                                                                                   | All boats are equipped with a GPS system                 | 73 boats equipped with a GPS system and 1 boat equipped with AIS | 23 boats equipped with a GPS system and 2 boats equipped with AIS |

#### Supplementary materials; Table S5a (Continued).

| Consortium name                     | Co.Vo.Pi S. Benedetto del Tronto.                          | Co.Ge.Vo Pescara.                                                                              | Abruzzo | Co.Ge.Vo Frentano Ortona.                                                | Consorzio Co.Ge.Mo Il Colosso di Barletta                                                      | Co.Ge.Mo Napoli                                                                         | Consorzio Co.Ge.Mo Gaeta                                                                | Consorzio Co.Ge.Mo Roma                                             |
|-------------------------------------|------------------------------------------------------------|------------------------------------------------------------------------------------------------|---------|--------------------------------------------------------------------------|------------------------------------------------------------------------------------------------|-----------------------------------------------------------------------------------------|-----------------------------------------------------------------------------------------|---------------------------------------------------------------------|
| <b>Compartment</b>                  | From the Chienti river (north) to the Tronto river (south) | From the mouth of the Tronto river (north) to the mouth of the Alento river (south)            |         | From Francavilla a mare (north) to the mouth of the river Trigno (south) | Barletta - From the municipality of Zapponeta (north) to the municipality of Bisceglie (south) | Naples - From the mouth of the Garigliano river (north) to the Procida mountain (south) | From the mouth of the Astura river (north) to the mouth of the Garigliano river (south) | Rome - From Fiumicino - Passoscuro to the mouth of the Astura river |
| <b>Number of associated vessels</b> | 56 out of 56 (clam)                                        | 74 out of 82 (clam)                                                                            |         | 21 out of 21 (clam)                                                      | 24 out of 25 (clam)                                                                            | 14 out of 14 (clam and razor clam)                                                      | 4 out of 4 (razor clam)                                                                 | 14 out of 14 (clam and razor clam)                                  |
| <b>Reference scientific body</b>    | CNR-IRBIM (formerly ISMAR)                                 | Zooprophylactic IZSAM (Experimental Institute of Abruzzo and Molise Giuseppe Caporale, Teramo) |         | CIRSPE (Italian Center for Research and Studies for Fishing, Rome)       | -                                                                                              | -                                                                                       | -                                                                                       | -                                                                   |
| <b>Target species</b>               | Clams                                                      | Clams                                                                                          |         | Clams                                                                    | Clams, lagoon cockle                                                                           | Razor clams, wedge shells, clams                                                        | Razor clams, wedge shells                                                               | Razor clams, wedge shells, clams                                    |

#### Supplementary materials; Table S5b. Consorsia present in Italy, with details on dislocation and fleet main characteristic and technologies.

|                        |                                                                                                               |                                                                                                                                                                                                                   |                                                                                                                                                                                                                                  |                                                                                                            |                                                                                                                                           |                                                                                                                                           |
|------------------------|---------------------------------------------------------------------------------------------------------------|-------------------------------------------------------------------------------------------------------------------------------------------------------------------------------------------------------------------|----------------------------------------------------------------------------------------------------------------------------------------------------------------------------------------------------------------------------------|------------------------------------------------------------------------------------------------------------|-------------------------------------------------------------------------------------------------------------------------------------------|-------------------------------------------------------------------------------------------------------------------------------------------|
| <b>Strengths</b>       | Rotation of fishing activities<br>Biennial monitoring of the resource<br>Collaboration with scientific bodies | Sowing, restocking and rotation activities<br>Constant monitoring of the resource<br>Adoption of more selective gears<br>Scientific support<br>Sensitization of fishermen towards environmental protection issues | Management of clam stocks with good yields both in terms of production and socio-economic level<br>Sowing, restocking and rotation activities<br>Constant monitoring of the resource<br>Scientific support<br>Fishermen training | Sowing, restocking and rotation activities<br>Adoption of more selective gears                             | Stock management of razor clams with good yields both in terms of production and socio-economic level<br>Constant capture data collection | Stock management of razor clams with good yields both in terms of production and socio-economic level<br>Constant capture data collection |
| <b>Critical issues</b> | Fluctuation of production yields<br>Intense die-off in 2018                                                   | Limited area of action, also following the establishment of the AMP Torre del Cerrano<br>Excessive fishing effort in terms of the number of boats<br>Decrease in production yields                                | Clam resource circumscribed and limited to some areas<br>Occasional events of deaths                                                                                                                                             | Fishing activity territorially limited due to adverse sedimentological causes<br>Excessive number of boats | Reduced availability of fishing grounds<br>Water classification                                                                           | Reduced availability of fishing grounds<br>Water classification                                                                           |
| <b>Notes</b>           | 46 boats equipped with a GPS system and 11 boats equipped with AIS system                                     | All boats equipped with a GPS system or AIS system                                                                                                                                                                | 18 boats equipped with a GPS system and 3 boats equipped with AIS system                                                                                                                                                         | All boats equipped with a GPS system                                                                       | Future endowment indicated                                                                                                                | -                                                                                                                                         |

**Supplementary materials; Table S5b** (Continued).

| Year        | 2002 | 2003 | 2004 | 2005 | 2006 | 2008 | 2007 | 2009 | 2010 | 2011 | 2012 | 2013 | 2014 | 2015 | 2016 | 2017 | 2018 | 2019 |
|-------------|------|------|------|------|------|------|------|------|------|------|------|------|------|------|------|------|------|------|
| Boat number | 41   | -    | 42   | 42   | 42   | 41   | 41   | 41   | 42   | 42   | -    | -    | 42   | 42   | 42   | 42   | 42   | 40   |

**Supplementary materials; Table S6.** Trend in the number of boats (2002–2018). Source IREPA–MIPAAF; Socio–economic observatory for fisheries and aquaculture.

Survey conducted by AGRI.TE.CO. for the Friuli–Venezia Giulia Region in the years 2017–2018; ISTAT working paper 2020.

|                          | Punta Sdobba | Banco Mula di Muggia | Isola Sant'Andrea | Lignano Sabbiadoro |
|--------------------------|--------------|----------------------|-------------------|--------------------|
| Tons                     | 10.3         | 16.1                 | 16.7              | 8.5                |
| Class 0.1 – 1.5 cm       | 2.8%         | 40.1%                | 49.3%             | 40.9%              |
| Class 1.6 – 1.9 cm       | 22.5%        | 24.8%                | 26.4%             | 28.4%              |
| Class 2.0 – 2.4 cm       | 71.6%        | 33.0%                | 22.1%             | 27.4%              |
| Class = 2.5 cm           | 3.1%         | 2.1%                 | 2.2%              | 3.3%               |
| Biomass g/m <sup>2</sup> | 51.5         | 53.7                 | 54.7              | 41.0               |

**Supplementary materials; Table S7.** Characteristics of the mussel population seeded in the different areas of Friuli Venezia Giulia to restore the *Chamelea gallina* population. Source of data: Co.Ge.Mo. Monfalcone, 2016.

| Survey time | Sampling month | ≥ 2.5 cm | 2.4 – 2.0 cm | ≤ 2.0 cm |
|-------------|----------------|----------|--------------|----------|
| Pre         | Feb 2016       | 0.5      | 0.3          | 0.9      |
| Post        | May 2016       | 0.2      | 19.8         | 20.0     |
| Post        | Jul 2016       | 0.6      | 0.4          | 1.0      |
| Post        | Aug 2016       | 0.1      | 0.1          | 0.2      |
| Post        | Oct 2016       | 0.0      | 0.0          | 0.0      |

**Supplementary materials; Table S8.** Biomass in g/m<sup>2</sup> of *Chamelea gallina* for the Punta Sdobba area before and after the reactivation action in April 2016: Co.Ge.Mo. Monfalcone, 2016.

| Survey time | Sampling month | ≥ 2.5 cm | 2.4 – 2.0 cm | ≤ 2.0 cm |
|-------------|----------------|----------|--------------|----------|
| Pre         | Feb 2016       | 0.1      | 4.3          | 4.4      |
| Post        | May 2016       | 4.8      | 16.2         | 21.0     |
| Post        | Jul 2016       | 1.7      | 15.4         | 17.1     |
| Post        | Aug 2016       | 3.4      | 14.1         | 17.5     |
| Post        | Oct 2016       | 2.8      | 8.0          | 10.8     |

**Supplementary materials; Table S9.** Biomass, in g/m<sup>2</sup>, of *Chamelea gallina* for the Banco Mula di Muggia area, before and after the reactivation intervention which took place in April 2016 (Data source: Co.Ge.Mo. Monfalcone, 2016).

| Survey time | Sampling mounth | ≥ 2.5 cm  | 2.4 – 2.0 cm | ≤ 2.0 cm  |
|-------------|-----------------|-----------|--------------|-----------|
| Pre         | Feb 2016        | 1.2       | 8.4          | 9.6       |
| Post        | May 2016        | Fish trap | Fish trap    | Fish trap |
| Post        | Jul 2016        | 18.0      | 33.7         | 51.6      |
| Post        | Aug 2016        | 25.1      | 31.8         | 56.8      |
| Post        | Oct 2016        | 43.3      | 33.4         | 76.6      |

**Supplementary materials; Table S10.** Biomass in g/m<sup>2</sup> of *Chamelea gallina* for the area in front of the Island of Sant'Andrea, before and after the reactivation intervention which took place in April 2016. Data source: Co.Ge.Mo. Monfalcone, 2016.

| Survey time | Sampling mounth | ≥ 2.5 cm | 2.4 – 2.0 cm | ≤ 2.0 cm |
|-------------|-----------------|----------|--------------|----------|
| Pre         | Feb 2016        | 2.9      | 2.3          | 5.2      |
| Post        | May 2016        | 0.9      | 3.1          | 4.0      |
| Post        | Jul 2016        | 5.6      | 8.1          | 13.8     |
| Post        | Aug 2016        | 5.0      | 3.4          | 8.5      |
| Post        | Oct 2016        | 10.7     | 2.3          | 13.0     |

**Supplementary materials; Table S11.** Biomass in g/m<sup>2</sup> of *Chamelea gallina* for the Lignano Sabbiadoro coast, before and after the reactivation intervention which took place in April 2016. Data source: Co.Ge.Mo. Monfalcone, 2016.

| Survey time | Sampling mounth | ≥ 2.5 cm | 2.4 – 2.0 cm | ≤ 2.0 cm |
|-------------|-----------------|----------|--------------|----------|
| Pre         | May2017         | 2.9      | 2.3          | 5.2      |
| Post        | Jul 2017        | 0.9      | 3.1          | 4.0      |
| Post        | Oct 2017        | 5.0      | 3.4          | 8.5      |

**Supplementary materials; Table S12.** Biomass, in g/m<sup>2</sup>, of *Chamelea gallina* for the Lignano Sabbiadoro coast, before and after the reactivation intervention which took place in May 2017. Data source: Co.Ge.Mo. Monfalcone, 2016.



| Compartment | Area                   | Good management | Attention range  | Prohibition of fishing |
|-------------|------------------------|-----------------|------------------|------------------------|
|             |                        |                 | g/m <sup>2</sup> |                        |
| GSA17       | North-central Adriatic | > 10.0          | 5.0 – 7.5        | < 5.0                  |

**Supplementary materials; Table S13.** Graphical representation of the fishing potential for Co.Ge.Mo. di Monfalcone to the state of the resource *Chamelea gallina*.

|                               | 2017  | 2017 | 2018 | sept -2018 | 2019 |
|-------------------------------|-------|------|------|------------|------|
| Punta Sdobba                  | 0.00  | N.D. | N.D. | 0.00       | N.D. |
| Banco Mula di Muggia          | 2.80  | N.D. | N.D. | 0.00       | N.D. |
| Banca d'Orio – Bocca d'Anfora | N.D.  | N.D. | N.D. | 0.10       | N.D. |
| Sant'Andrea Island            | 43.30 | N.D. | N.D. | 1.50       | N.D. |
| Lignano Sabbiadoro            | 10.70 | 5.00 | 3.35 | 1.10       | 5.03 |

**Supplementary materials; Table S14.** Biomass (g/m<sup>2</sup>) of *Chamelea gallina* over commercial size, compared with the indications reported for GSA17 in the D.M. 24/07/2015. Data source: Co.Ge.Mo. Monfalcone, 2016; Co.Ge.Mo. Monfalcone, 2019. N.D. is for No Data Available.
